# Supplementary material for: Finally, inkjet-printed metal halide perovskite LEDs – utilizing seed crystal templating of salty PEDOT:PSS
Source: Royal Society of Chemistry journal article supplement (doi:10.1039/d0mh00512f), 2020-01-01
Supplement: d0mh00512f1.pdf [file d0mh00512f1.pdf]

## ELECTRONIC SUPPLEMENTARY INFORMATION

### **Finally, inkjet-printed metal halide perovskite LEDs – utilizing seed crystal templating of salty PEDOT:PSS**

Felix Hermerschmidt,<sup>†a</sup> Florian Mathies,<sup>†b</sup> Vincent R. F. Schröder,<sup>a</sup> Carolin Rehermann,<sup>b</sup> Nicolas Zorn Morales,<sup>a</sup> Eva L. Unger<sup>b,c</sup> and Emil J. W. List-Kratochvil<sup>\*a,d</sup>

<sup>a</sup>Humboldt-Universität zu Berlin, Institut für Physik, Institut für Chemie, IRIS Adlershof, Brook-Taylor-Straße 6, 12489 Berlin, Germany. Email: emil.list-kratochvil@hu-berlin.de

<sup>b</sup>Young Investigator Group Hybrid Materials Formation and Scaling, Helmholtz-Zentrum Berlin für Materialien und Energie GmbH, Kekuléstraße 5, 12489 Berlin, Germany.

<sup>c</sup>Chemical Physics and NanoLund, Lund University, PO Box 124, 22100 Lund, Sweden.

<sup>d</sup>Helmholtz-Zentrum, Berlin für Materialien und Energie GmbH, Brook-Taylor-Straße 6, 12489 Berlin, Germany.

ELECTRONIC SUPPLEMENTARY INFORMATION

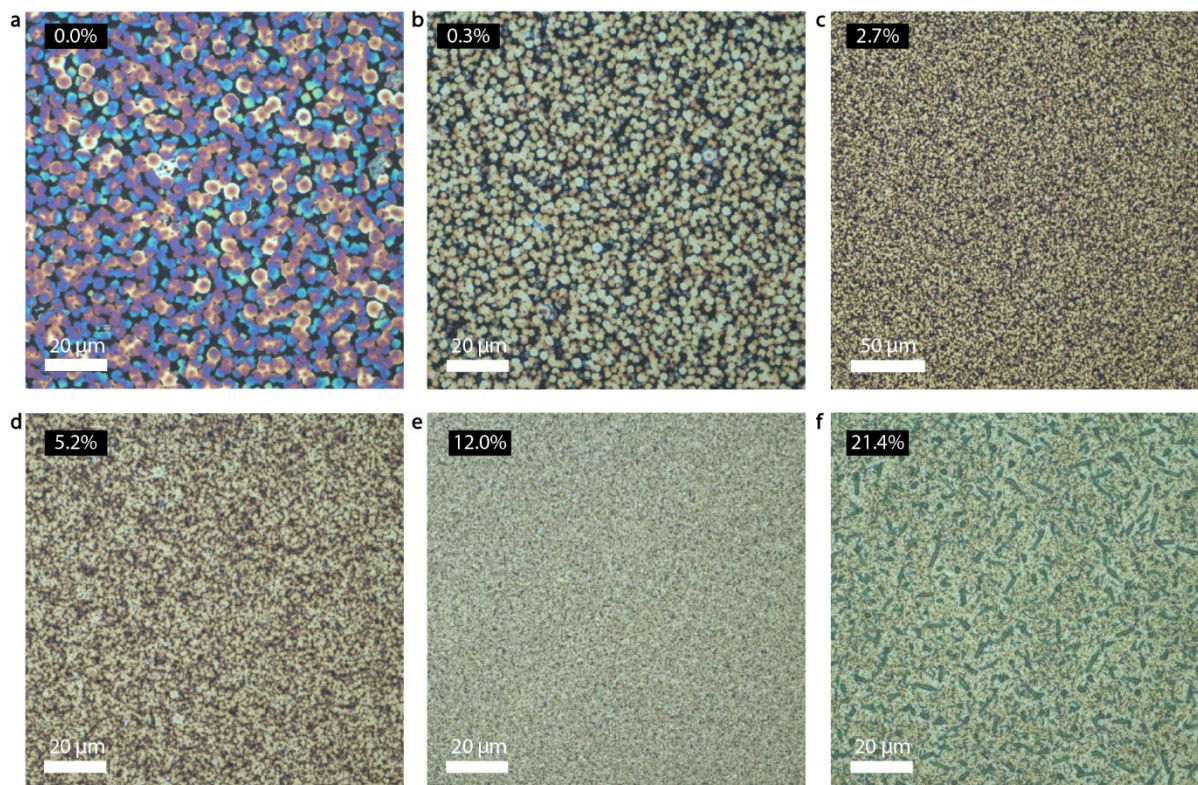

**Figure S1:** The optical microscopy images of MAPbBr<sub>3</sub>:PEG composite blended with **a** 0.0%, **b** 0.3%, **c** 2.7%, **d** 5.2%, **e** 12.0% and **f** 21.4% PEG show optimum homogeneous morphology at 12.0% PEG addition.

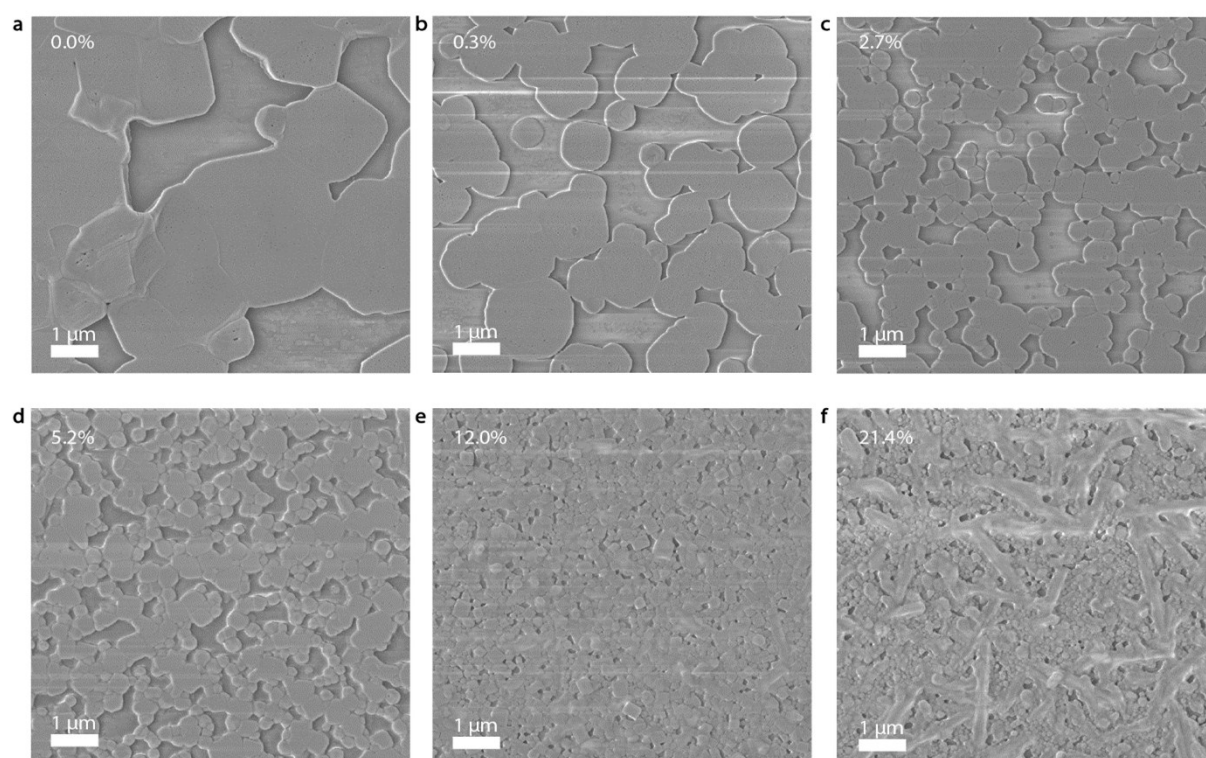

**Figure S2:** The scanning electron microscopy images of MAPbBr<sub>3</sub>:PEG composite blended with **a** 0.0%, **b** 0.3%, **c** 2.7%, **d** 5.2%, **e** 12.0% and **f** 21.4% PEG confirm the optimum morphology for 12.0% PEG.

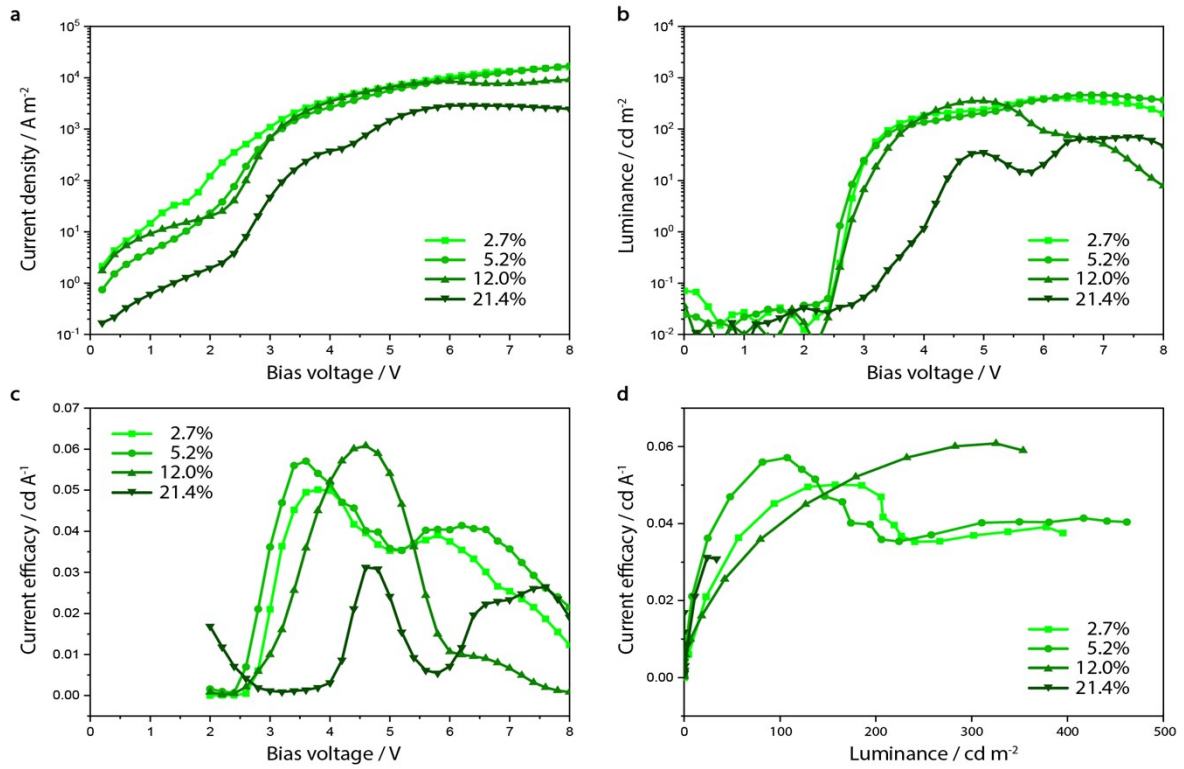

**Figure S3:** Also the device performance parameters for PeLEDs incorporating MAPbBr<sub>3</sub> perovskite active layer blended with 2.7%, 5.2%, 12.0% and 21.4% PEG, respectively, show optimum performance with 12% PEG content.

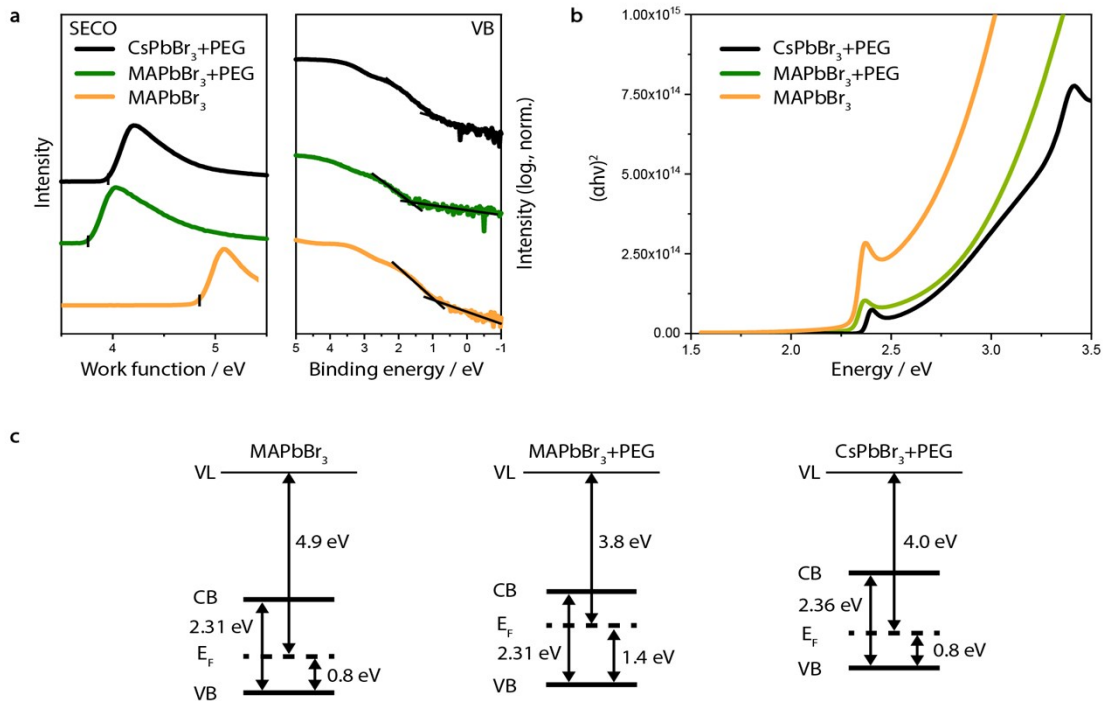

**Figure S4:** **a** The secondary electron cut-off and valence band on-set, **b** Tauc plots based on UV-vis absorption spectroscopy and **c** schematic of energy levels for MAPbBr<sub>3</sub>, MAPbBr<sub>3</sub>:PEG and CsPbBr<sub>3</sub>:PEG resulting from the experimental data.

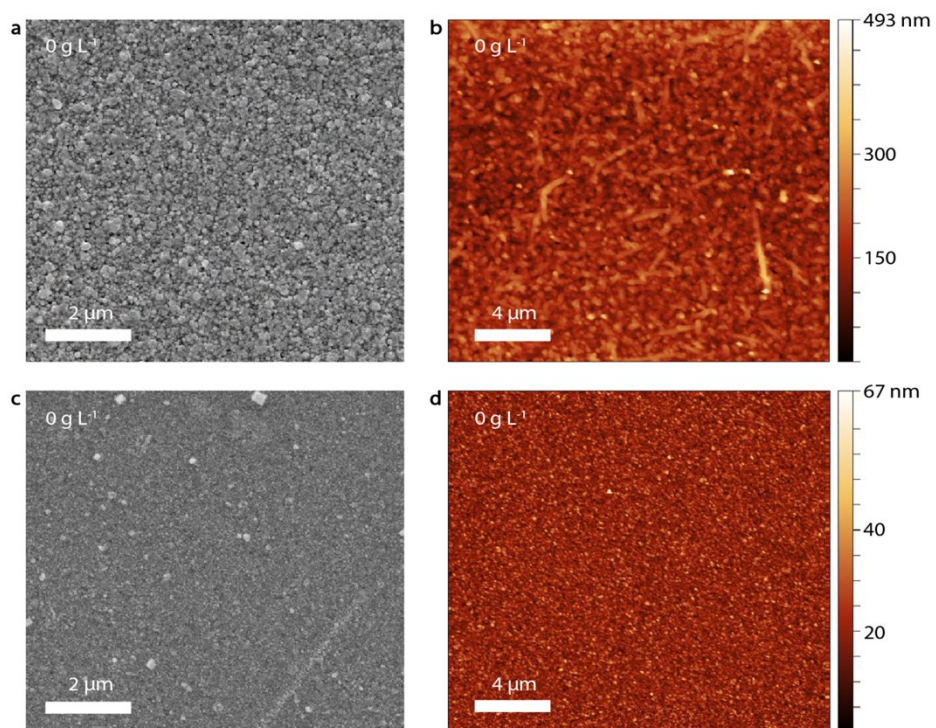

**Figure S5:** The SEM and SFM images of spin-coated (a, b) and inkjet-printed (c, d) MAPbBr<sub>3</sub>:PEG composite films on pristine PEDOT:PSS (without KCl) confirm the pinhole-free active layer morphology achievable from the two processing methods.

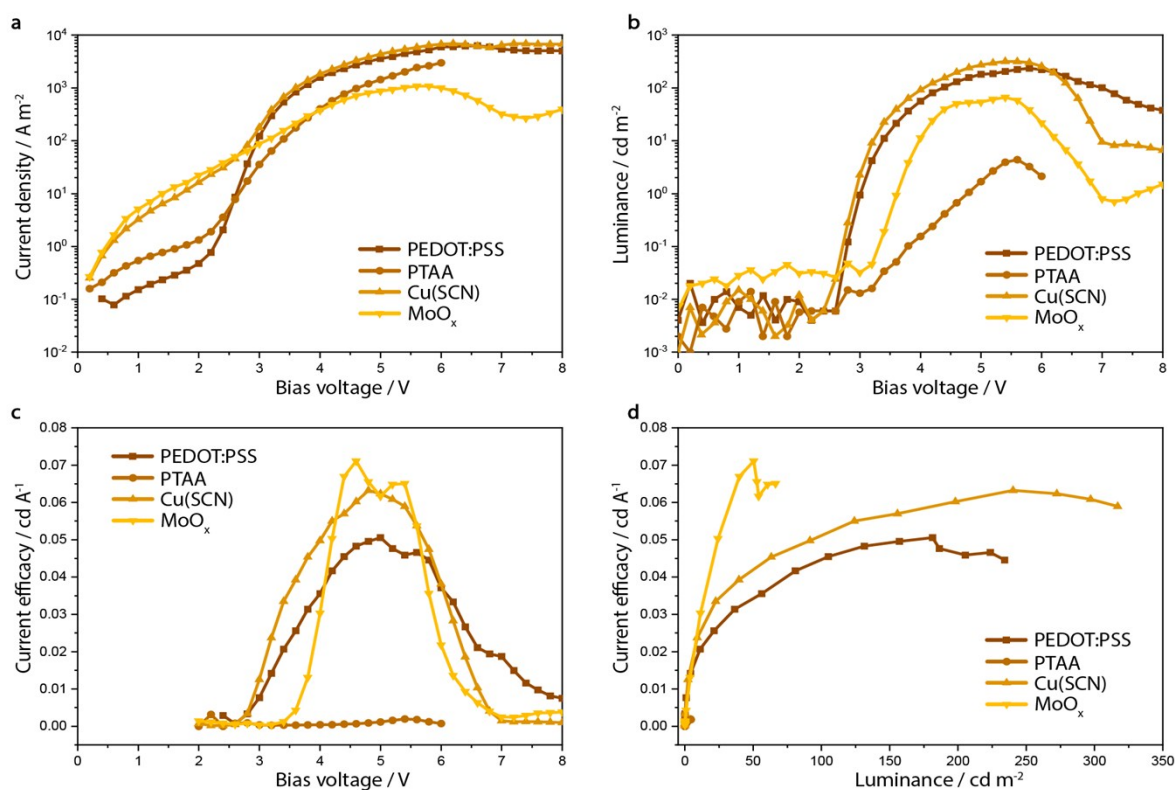

**Figure S6:** MAPbBr<sub>3</sub>:PEG-based devices were produced on pristine PEDOT:PSS or molybdenum oxide (MoO<sub>x</sub>) as HIL as well as PEDOT:PSS plus either poly[bis(4-phenyl)(2,4,6-trimethylphenyl)amine] (PTAA) and cuprous thiocyanate (CuSCN). Stark contrasts are seen, with only the processing on pristine PEDOT:PSS yielding devices that show the best combination of low leakage current and reasonable device luminance. Devices with MAPbBr<sub>3</sub>:PEG active layer processed on pristine PTAA and CuSCN failed to function due to low wetting on PTAA and washing away of CuSCN during processing. PeLEDs including MoO<sub>x</sub> layer showed degradation during operation due to interactions between MoO<sub>x</sub> and the MAPbBr<sub>3</sub>:PEG composite layer.

ELECTRONIC SUPPLEMENTARY INFORMATION

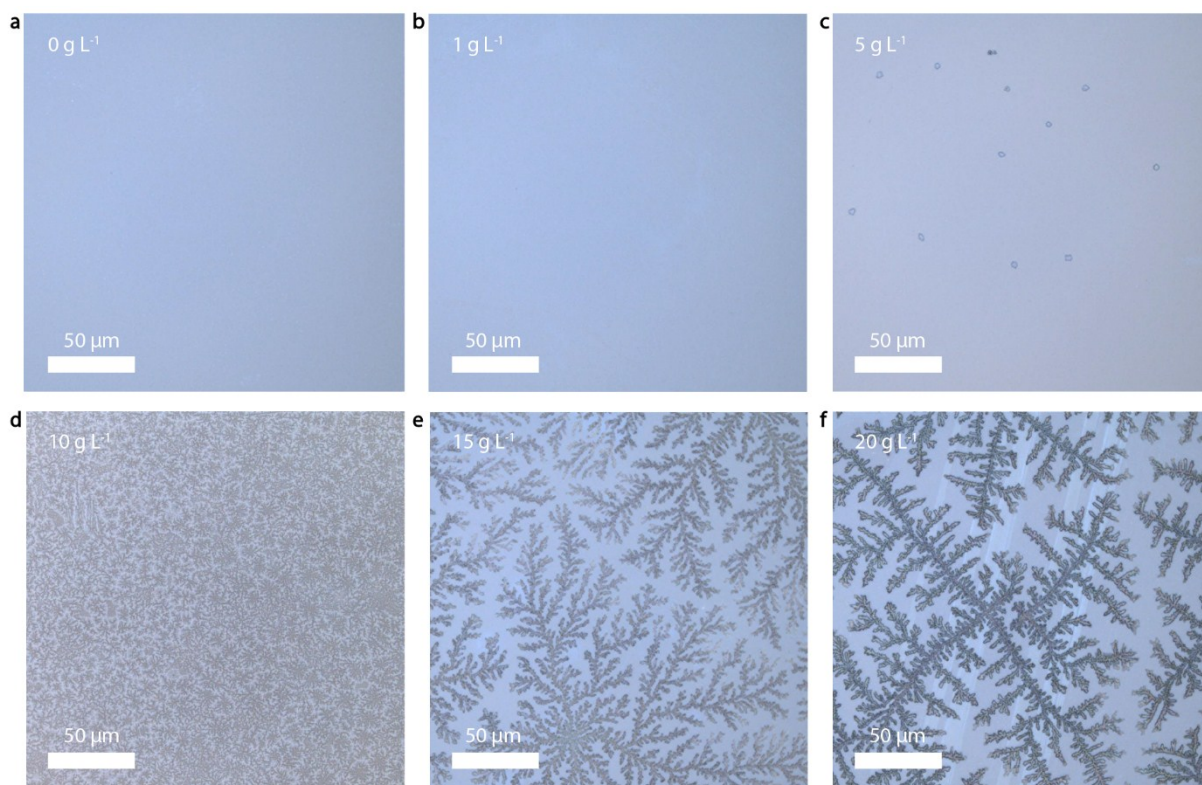

**Figure S7:** The series of optical microscope images of the PEDOT:PSS layer with increasing amounts of KCl shows the increasingly large dendritic structures of the KCl.

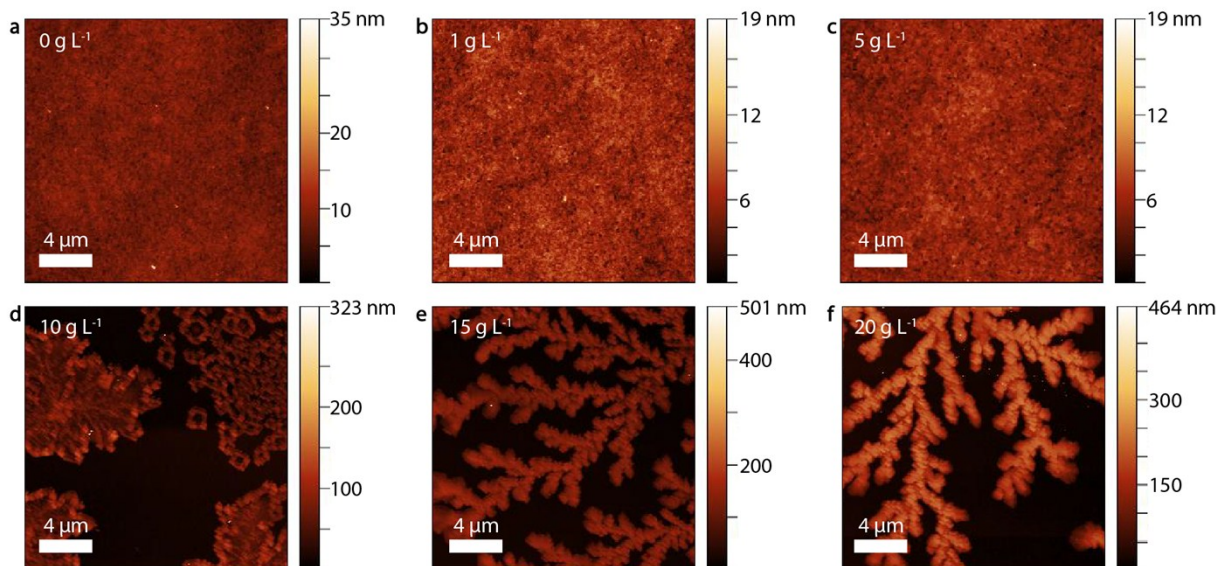

**Figure S8:** The dendritic structures are confirmed in SFM images of PEDOT:PSS incorporating increasing amounts of KCl.

ELECTRONIC SUPPLEMENTARY INFORMATION

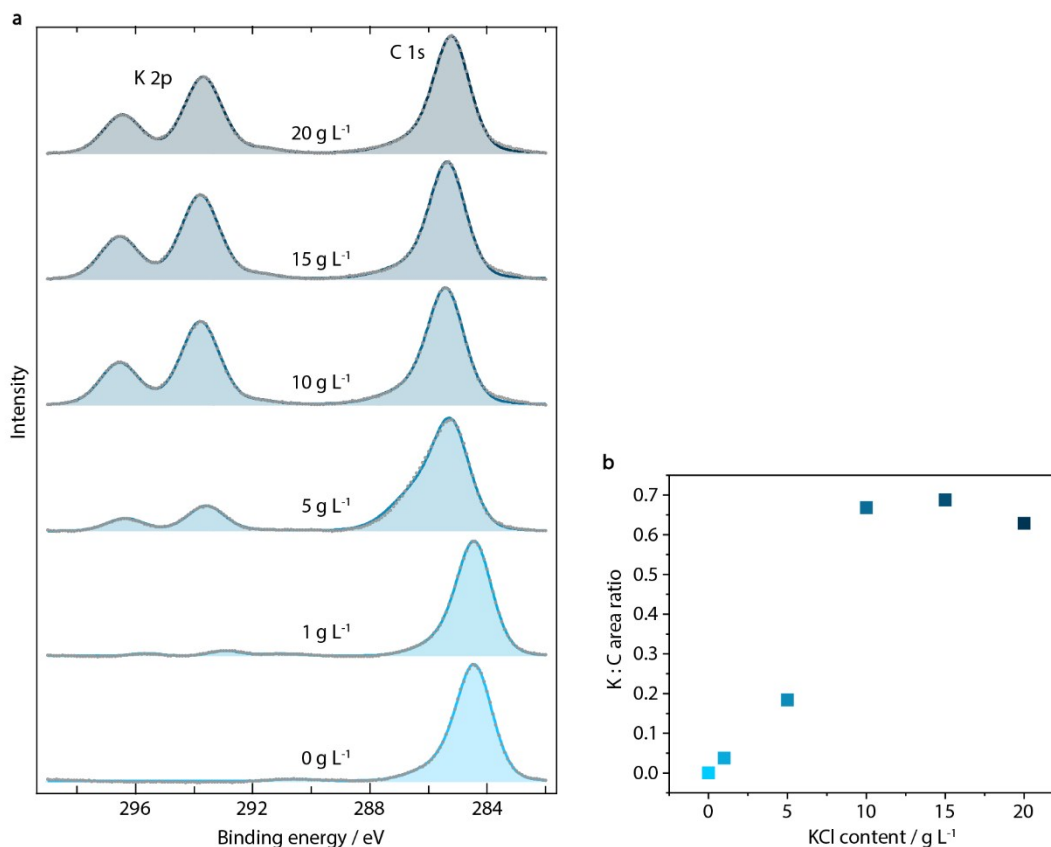

**Figure S9:** **a** XPS spectra show the increasing K 2p peak (doublet at 295 eV, corresponding to the added KCl) and the C 1s peak (285 eV, corresponding to the PEDOT:PSS surface), **b** the K:C area ratios show the saturation at high KCl content.

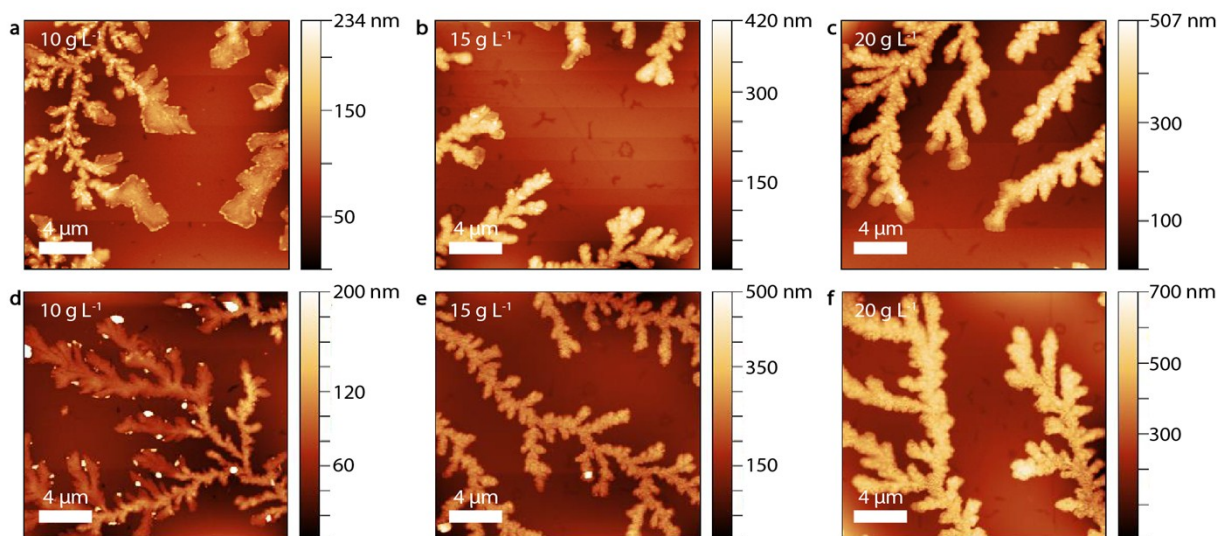

**Figure S10:** The SFM images of PEDOT:PSS layers containing KCl before and after washing with the solvent used for perovskite deposition show no noticeable change in the dendritic structures visible.

**Table S1:** This is confirmed in the feature heights measured before and after washing.

|              | 0 g L <sup>-1</sup> | 1 g L <sup>-1</sup> | 5 g L <sup>-1</sup> | 10 g L <sup>-1</sup> | 15 g L <sup>-1</sup> | 20 g L <sup>-1</sup> |
|--------------|---------------------|---------------------|---------------------|----------------------|----------------------|----------------------|
| pre washing  | -                   | -                   | -                   | ~100 nm              | ~250 nm              | ~330 nm              |
| post washing | -                   | -                   | -                   | ~50 nm               | ~210 nm              | ~300 nm              |

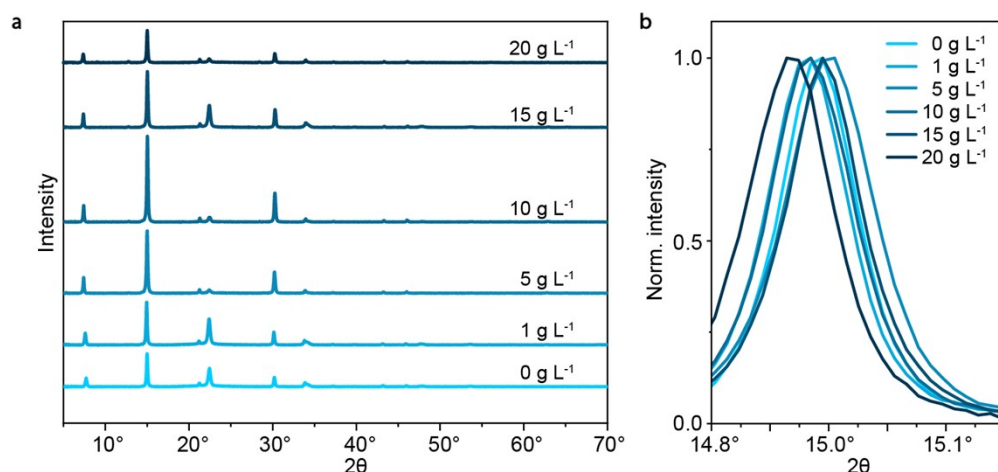

**Figure S11:** a XRD diffraction patterns of the full series of MAPbBr<sub>3</sub>:PEG-composite spin-coated on PEDOT:PSS/KCl with increasing KCl concentration indicate no apparent shift in the diffraction peaks. The diffraction peaks at 7.5° and 22.5° most likely result from the PEG. b No trend in shift of the magnified predominant [100] MAPbBr<sub>3</sub> diffraction peak is visible as a function of KCl content.

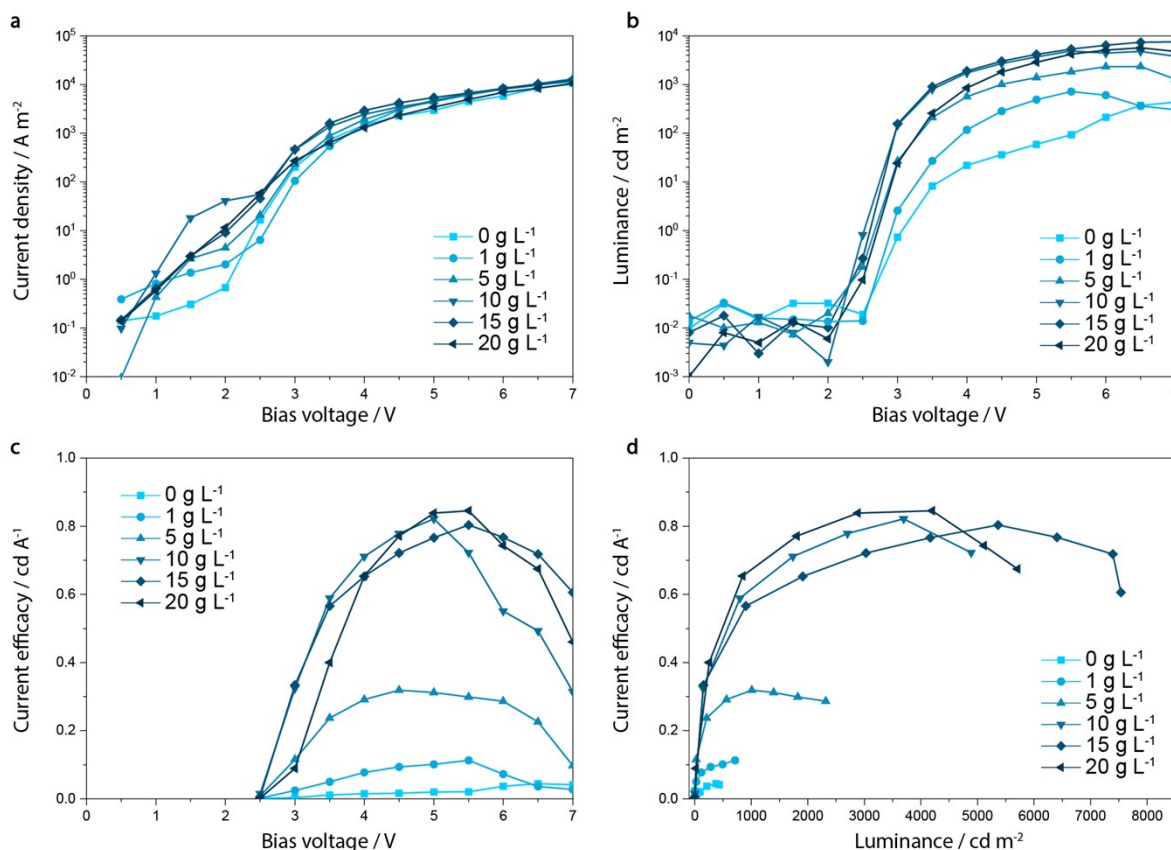

**Figure S12:** The current density / voltage / luminance curves of spin coated devices incorporating varying amounts of KCl within the PEDOT:PSS HIL show the rising luminance and current efficacy (cd A<sup>-1</sup>) as a function of incorporated KCl. While the absolute maximum efficacy is achieved by devices incorporating 20 g L<sup>-1</sup> KCl, this maximum is only marginally greater than that obtained from devices incorporating 15 g L<sup>-1</sup> KCl, but at the expense of a much lower luminance.



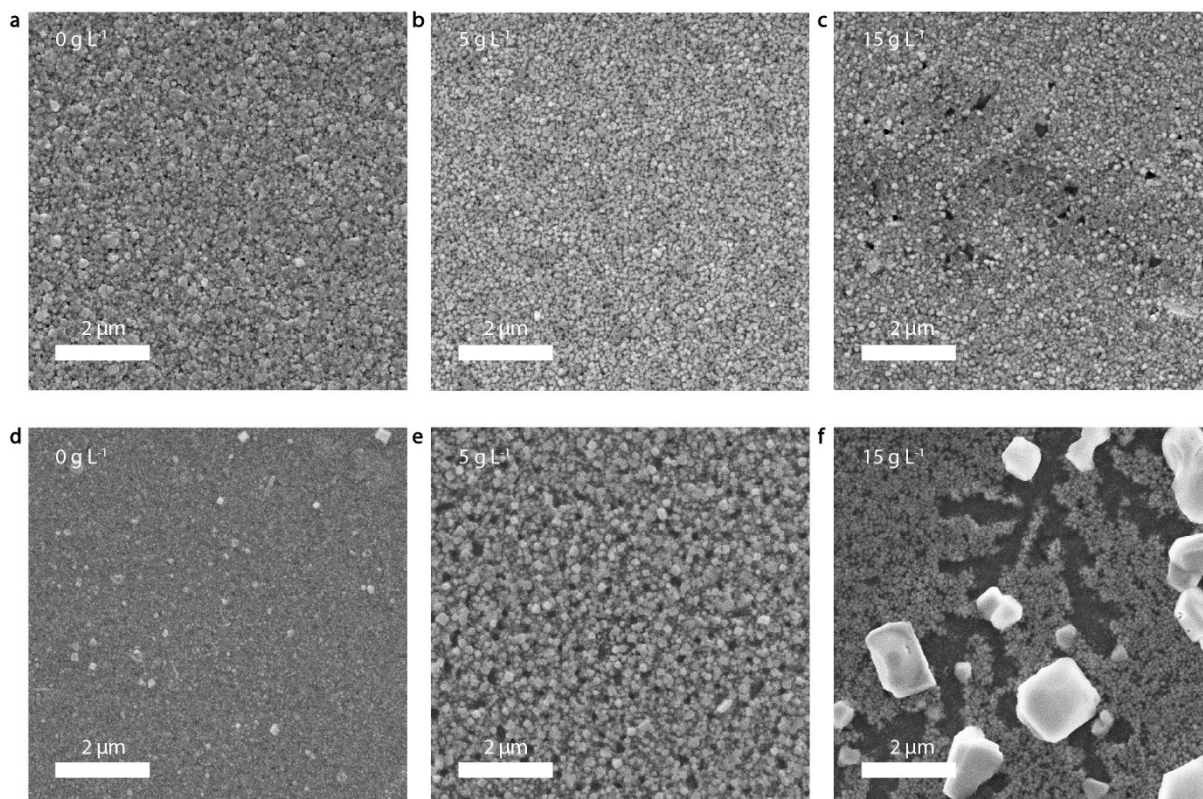

**Figure S13:** The SEM images of MAPbBr<sub>3</sub>:PEG-composite spin-coated (top row **a-c**) and inkjet-printed (bottom row **d-f**) on PEDOT:PSS/KCl show different effects when increasing KCl concentration from 0 g L<sup>-1</sup> to 5 g L<sup>-1</sup> to 15 g L<sup>-1</sup>. While similar morphology is seen for spin-coated and inkjet-printed layers at KCl concentrations of 15 g L<sup>-1</sup> (**c**) and 5 g L<sup>-1</sup> (**e**), respectively, a substantial difference in morphology is observed for layers inkjet-printed on PEDOT:PSS containing 15 g L<sup>-1</sup>. This leads to the two different optimums achieved in PeLED device performance described in the main text.

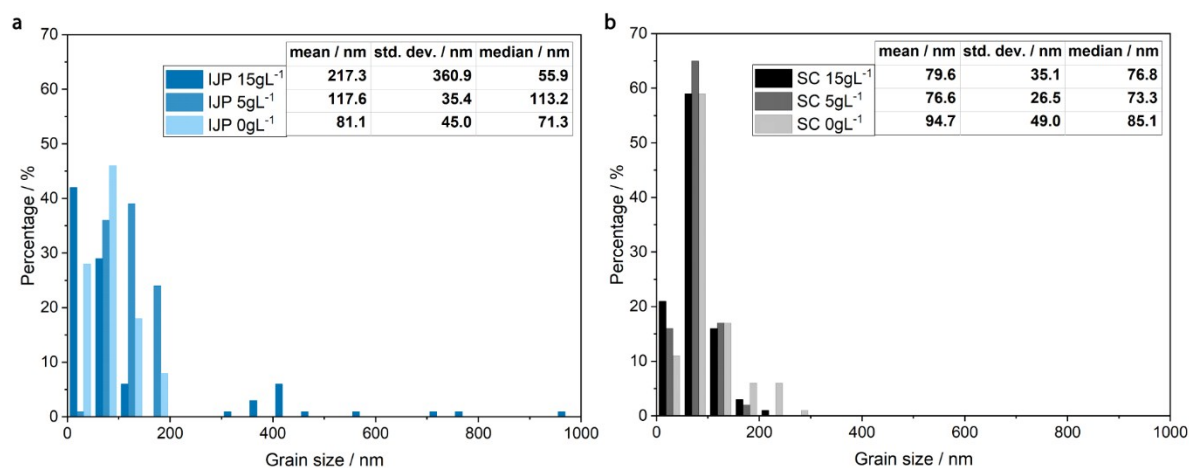

**Figure S14:** Upon increasing the KCl content, smaller average grains are seen for spin-coated devices. Additionally, the standard deviation decreases, signifying a more homogeneous film. For inkjet-printed films, the mean grain size increases with increasing KCl content. But while at 5 g L<sup>-1</sup> the standard deviation is also lower, indicating a more homogenous film, for the high KCl content of 15 g L<sup>-1</sup> these values have to be taken with care, as some micrometer large grains distort the calculations.
